# Supplementary material
Source: HighWire-hosted journal article supplement (https://bmjmedicine.bmj.com/highwire/filestream/616/field_highwire_adjunct_files/0/bmjmed-2022-000245supp001_data_supplement.pdf)
Supplement: bmjmed-2022-000245supp001_data_supplement.pdf [file bmjmed-2022-000245supp001_data_supplement.pdf]

## Supplementary Methods

Data cleaning, analysis and visualisation were performed using the following R packages: *mice* (version 3.13.0),<sup>1</sup> *arsenal* (version 3.6.3),<sup>2</sup> *dplyr* (version 1.0.6)<sup>3</sup> and *forestplot* (version 2.0.1)<sup>4</sup> packages.

## Supplementary Table and Figure Legends

**Supplementary Table 1** List of relevant medications or interventions for each outcome. Myocarditis, pericarditis, endocarditis and acute coronary syndrome were defined according to the diagnostic criteria of the corresponding European Society of Cardiology (ESC) guidelines.<sup>5-8</sup> For arrhythmias, definitions were based on the American College of Cardiology (ACC)/American Heart Association (AHA)/Heart Rhythm Society (HRS) 2006 data standards.<sup>9</sup>

**Supplementary Table 2** Variables included in the multiple imputation model and their level of missingness, overall and by sex.

**Supplementary Table 3** Percentage of participants receiving treatment with cardiovascular medications or procedures, by sex. Information on baseline medication use was missing for 0.1% of participants. The number of participants with missing information on prior procedures was 1080 (9.7%) overall, 499 (11.2%) in females and 581 (8.6%) in males. S = suppressed due to small numbers <20. PCI = percutaneous coronary intervention, CABG = coronary artery bypass graft.

**Supplementary Table 4** Baseline characteristics of the CAPACITY-COVID registry participants, by sex and pre-existing cardiovascular disease (CVD).

**Supplementary Table 5** Hospitalisation characteristics and outcomes of the CAPACITY-COVID registry participants, by sex.

**Supplementary Figure 1** Recruitment to the CAPACITY-COVID registry over time.

**Supplementary Figure 2** Flow diagram of cohort selection.

**Supplementary Figure 3** Presenting symptoms in females and males, stratified by age (top panel: ≤65 years; bottom panel: >65 years). Orange = females; Green = males. GI = gastrointestinal.

**Supplementary Figure 4** Summary statistics of vital measurements (temperature, respiratory rate, heart rate, blood pressure and oxygen saturation) and laboratory measurements (C-reactive protein, white blood cell count, lymphocyte count, haemoglobin, platelets and creatinine), by sex.

**Supplementary Figure 5** Odds ratios (ORs, with 95% confidence intervals [CIs]) for the association between sex and the outcomes, using four sets of model adjustments: (i) no adjustment, (ii) age and ethnicity, (iii) age, ethnicity, cardiovascular disease (CVD) history and medication use, and (iv) age, ethnicity, CVD history, medication use and CVD risk factors (hypertension, diabetes, dyslipidemia, peripheral arterial disease and body mass index).

**Supplementary Figure 6** Complete case analyses: Odds ratios (ORs, with 95% confidence intervals [CIs]) for the association between sex and the outcomes of interest. Unadjusted and adjusted estimates are presented. In adjusted analyses, models were adjusted for age, ethnicity, cardiovascular disease (CVD) history, medication use and CVD risk factors (hypertension, diabetes, dyslipidemia, peripheral arterial disease and body mass index).

**Supplementary Figure 7** Complete case analyses: Female-to-male odds ratios (ORs, with 95% confidence intervals [CIs]) in the cohorts without and with pre-existing cardiovascular disease (CVD), and the corresponding ratio of OR (with 95% CI). Unadjusted and adjusted estimates are presented. In adjusted analyses, models were adjusted for age, ethnicity, CVD history, medication use and CVD risk factors (hypertension, diabetes, dyslipidemia, peripheral arterial disease and body mass index).

**Supplementary Figure 8** Sensitivity analyses with patients from selective recruitment sites excluded: Odds ratios (ORs, with 95% confidence intervals [CIs]) for the association between sex and the outcomes of interest. Unadjusted and adjusted estimates are presented. In adjusted analyses, models

were adjusted for age, ethnicity, cardiovascular disease (CVD) history, medication use and CVD risk factors (hypertension, diabetes, dyslipidemia, peripheral arterial disease and body mass index).

**Supplementary Figure 9** Sensitivity analyses with patients from selective recruitment sites excluded: Female-to-male odds ratios (ORs, with 95% confidence intervals [CIs]) in the cohorts without and with pre-existing cardiovascular disease (CVD), and the corresponding ratio of OR (with 95% CI). Unadjusted and adjusted estimates are presented. In adjusted analyses, models were adjusted for age, ethnicity, CVD history, medication use and CVD risk factors (hypertension, diabetes, dyslipidemia, peripheral arterial disease and body mass index).

## Supplementary Material

**Supplementary Table 1** List of relevant medications or interventions for each outcome. Myocarditis, pericarditis, endocarditis and acute coronary syndrome were defined according to the diagnostic criteria of the corresponding European Society of Cardiology (ESC) guidelines.<sup>5-8</sup> For arrhythmias, definitions were based on the American College of Cardiology (ACC)/American Heart Association (AHA)/Heart Rhythm Society (HRS) 2006 data standards.<sup>9</sup>

| Cardiovascular complication (outcome)           | Relevant medication/intervention                                                                                                                                                                                                                                                                                                                                     |
|-------------------------------------------------|----------------------------------------------------------------------------------------------------------------------------------------------------------------------------------------------------------------------------------------------------------------------------------------------------------------------------------------------------------------------|
| Any cardiac/thromboembolic complication / death | Any of:<br>Beta-blocker, antiarrhythmic drugs, digoxin, diuretics, CCBs, ACEIs, ARBs, aldosterone antagonists, sacubitril/valsartan, phosphodiesterase inhibitors, anti-platelet agents, coumarin, DOACs, lipid-lowering agents, other CV medications, CABG, PCI, and intervention for valvular heart disease performed<br><br>NOT: insulin/oral antidiabetic agents |
| Arrhythmia / supraventricular tachycardia       | Any of:<br>Beta-blocker, Antiarrhythmic drugs, digoxin, and CCBs                                                                                                                                                                                                                                                                                                     |
| Cardiac ischemia                                | Any of:<br>Beta-blocker, ACEIs, ARBs, anti-platelet agents, coumarin, DOACs, lipid-lowering agents, Pharmacological intervention, CABG and PCI                                                                                                                                                                                                                       |
| Heart failure / new-onset heart failure         | Any of:<br>Digoxin, diuretics, ACEIs, ARBs, aldosterone antagonists, sacubitril/valsartan, antiarrhythmic drugs                                                                                                                                                                                                                                                      |
| Stroke                                          | Any of:<br>Anti-platelet agents, DOACs, coumarin                                                                                                                                                                                                                                                                                                                     |
| Pulmonary embolism                              | Any of :<br>Coumarin, DOACs, anti-platelet agents                                                                                                                                                                                                                                                                                                                    |

**Supplementary Table 2** Variables included in the multiple imputation model and their level of missingness, overall and by sex.

| Characteristic                            | n (%) missing        |                      |                    |
|-------------------------------------------|----------------------|----------------------|--------------------|
|                                           | Total<br>(n = 11167) | Female<br>(n = 4438) | Male<br>(n = 6729) |
| <b>Demographic characteristics</b>        |                      |                      |                    |
| Age                                       | -                    | -                    | -                  |
| Ethnicity                                 | 1172 (10.5%)         | 435 (9.8%)           | 737 (11.0%)        |
| <b>Cardiovascular disease history</b>     |                      |                      |                    |
| Any cardiovascular disease                | 1070 (9.6%)          | 494 (11.1%)          | 576 (8.6%)         |
| Arrhythmia/conduction disorder            | 1080 (9.7%)          | 499 (11.2%)          | 581 (8.6%)         |
| Supraventricular tachycardia              | 1096 (9.8%)          | 507 (11.4%)          | 589 (8.8%)         |
| Coronary artery disease                   | 1080 (9.7%)          | 499 (11.2%)          | 581 (8.6%)         |
| Myocardial infarction                     | 1254 (11.2%)         | 541 (12.2%)          | 713 (10.6%)        |
| Heart failure                             | 1080 (9.7%)          | 499 (11.2%)          | 581 (8.6%)         |
| Valvular heart disease                    | 1080 (9.7%)          | 499 (11.2%)          | 581 (8.6%)         |
| Congenital heart disease                  | 1080 (9.7%)          | 499 (11.2%)          | 581 (8.6%)         |
| Other cardiac disease                     | 1080 (9.7%)          | 499 (11.2%)          | 581 (8.6%)         |
| <b>Relevant CVD medication use</b>        |                      |                      |                    |
| Any cardiovascular complication           | 284 (2.5%)           | 117 (2.6%)           | 167 (2.5%)         |
| Arrhythmia / supraventricular tachycardia | 2781 (24.9%)         | 1074 (24.2%)         | 1707 (25.4%)       |
| Cardiac ischemia                          | 844 (7.6%)           | 392 (8.8%)           | 452 (6.7%)         |
| Heart failure                             | 2657 (23.8%)         | 1029 (23.2%)         | 1628 (24.2%)       |
| Stroke                                    | 3582 (32.1%)         | 1561 (35.2%)         | 2021 (30.0%)       |
| Pulmonary embolism                        | 3582 (32.1%)         | 1561 (35.2%)         | 2021 (30.0%)       |
| <b>Cardiovascular risk factors</b>        |                      |                      |                    |
| BMI                                       | 3894 (34.9%)         | 1679 (37.8%)         | 2215 (32.9%)       |
| Diabetes                                  | 159 (1.4%)           | 54 (1.2%)            | 105 (1.6%)         |
| Hypertension                              | 271 (2.4%)           | 93 (2.1%)            | 178 (2.6%)         |
| Peripheral arterial disease               | 3898 (34.9%)         | 1600 (36.1%)         | 2298 (34.2%)       |
| Dyslipidemia                              | 677 (6.1%)           | 270 (6.1%)           | 407 (6.0%)         |
| <b>Outcomes</b>                           |                      |                      |                    |
| Any complication                          | 104 (0.9%)           | 44 (1.0%)            | 60 (0.9%)          |
| Arrhythmia                                | 104 (0.9%)           | 44 (1.0%)            | 60 (0.9%)          |
| Supraventricular tachycardia              | 112 (1.0%)           | 48 (1.1%)            | 64 (1.0%)          |
| Cardiac ischemia                          | 104 (0.9%)           | 44 (1.0%)            | 60 (0.9%)          |
| Heart failure                             | 104 (0.9%)           | 44 (1.0%)            | 60 (0.9%)          |
| New-onset heart failure                   | 104 (0.9%)           | 44 (1.0%)            | 60 (0.9%)          |
| Stroke                                    | 104 (0.9%)           | 44 (1.0%)            | 60 (0.9%)          |
| Pulmonary embolism                        | 104 (0.9%)           | 44 (1.0%)            | 60 (0.9%)          |
| All-cause mortality                       | 55 (0.5%)            | 19 (0.4%)            | 36 (0.5%)          |

**Supplementary Table 3** Percentage of participants receiving treatment with cardiovascular medications or procedures, by sex. Information on baseline medication use was missing for 0.1% of participants. The number of participants with missing information on prior procedures was 1080 (9.7%) overall, 499 (11.2%) in females and 581 (8.6%) in males. S = suppressed due to small numbers <20. PCI = percutaneous coronary intervention, CABG = coronary artery bypass graft.

|                                 | <b>Total<br/>(n = 11167)</b> | <b>Female<br/>(n = 4438)</b> | <b>Male<br/>(n = 6729)</b> |
|---------------------------------|------------------------------|------------------------------|----------------------------|
| <b>Medication</b>               |                              |                              |                            |
| Beta-blocker                    | 2669 (23.9%)                 | 1065 (24.0%)                 | 1604 (23.9%)               |
| Anti-arrhythmia agent           | 479 (4.3%)                   | 184 (4.2%)                   | 295 (4.4%)                 |
| Digoxin                         | 210 (1.9%)                   | 100 (2.3%)                   | 110 (1.6%)                 |
| Diuretic                        | 2054 (18.4%)                 | 913 (20.6%)                  | 1141 (17.0%)               |
| Calcium channel blocker         | 1756 (15.7%)                 | 699 (15.8%)                  | 1057 (15.7%)               |
| ACE inhibitor                   | 1740 (15.6%)                 | 584 (13.2%)                  | 1156 (17.2%)               |
| Angiotensin receptor blocker    | 1119 (10.0%)                 | 468 (10.6%)                  | 651 (9.7%)                 |
| Aldosterone antagonist          | 310 (2.8%)                   | 123 (2.8%)                   | 187 (2.8%)                 |
| Entresto                        | 34 (0.3%)                    | S                            | S                          |
| Phosphodiesterase inhibitors    | 25 (0.2%)                    | S                            | S                          |
| Anti-platelet agent             | 1915 (17.2%)                 | 636 (14.4%)                  | 1279 (19.0%)               |
| Coumarin                        | 393 (3.5%)                   | 136 (3.1%)                   | 257 (3.8%)                 |
| Direct oral anticoagulant agent | 1066 (9.6%)                  | 408 (9.2%)                   | 658 (9.8%)                 |
| Lipid-lowering agent            | 3588 (32.2%)                 | 1275 (28.8%)                 | 2313 (34.4%)               |
| Insulin                         | 806 (7.2%)                   | 327 (7.4%)                   | 479 (7.1%)                 |
| Oral anti-diabetic agent        | 1615 (14.5%)                 | 611 (13.8%)                  | 1004 (14.9%)               |
| Other cardiovascular medication | 493 (4.4%)                   | 184 (4.2%)                   | 309 (4.6%)                 |
| <b>Procedures</b>               |                              |                              |                            |
| PCI                             | 643 (6.4%)                   | 142 (3.6%)                   | 501 (8.1%)                 |
| CABG                            | 376 (3.7%)                   | 57 (1.4%)                    | 319 (5.2%)                 |
| Intervention performed/planned  | n = 438                      | n = 176                      | n = 262                    |
| No intervention                 | 230 (52.5%)                  | 110 (62.5%)                  | 120 (45.8%)                |
| Intervention                    | 177 (40.4%)                  | 50 (28.4%)                   | 127 (48.5%)                |
| Not specified                   | 31 (7.1%)                    | 16 (9.1%)                    | 15 (5.7%)                  |

**Supplementary Table 4** Baseline characteristics of the CAPACITY-COVID registry participants, by sex and pre-existing cardiovascular disease (CVD).

|                                        | Without pre-existing cardiovascular disease |                      |                    | With pre-existing cardiovascular disease |                      |                    |
|----------------------------------------|---------------------------------------------|----------------------|--------------------|------------------------------------------|----------------------|--------------------|
|                                        | Total<br>(n = 6674)                         | Female<br>(n = 2727) | Male<br>(n = 3947) | Total<br>(n = 3423)                      | Female<br>(n = 1217) | Male<br>(n = 2206) |
| <b>Demographic characteristics</b>     |                                             |                      |                    |                                          |                      |                    |
| Age (years), mean (SD)                 | 62.3 (15.9)                                 | 63.5 (16.9)          | 61.6 (15.2)        | 74.6 (12.0)                              | 76.1 (12.6)          | 73.8 (11.5)        |
| Age group (years)                      |                                             |                      |                    |                                          |                      |                    |
| 18 - 25                                | 100 (1.5%)                                  | 48 (1.8%)            | 52 (1.3%)          | S                                        | S                    | S                  |
| 26 - 35                                | 306 (4.6%)                                  | 146 (5.4%)           | 160 (4.1%)         | 19 (0.6%)                                | S                    | 11 (0.5%)          |
| 36 - 45                                | 564 (8.5%)                                  | 214 (7.8%)           | 350 (8.9%)         | 48 (1.4%)                                | 25 (2.1%)            | 23 (1.0%)          |
| 46 - 55                                | 1182 (17.7%)                                | 423 (15.5%)          | 759 (19.2%)        | 167 (4.9%)                               | 61 (5.0%)            | 106 (4.8%)         |
| 56 - 65                                | 1643 (24.6%)                                | 607 (22.3%)          | 1036 (26.2%)       | 452 (13.2%)                              | 122 (10.0%)          | 330 (15.0%)        |
| 66 - 75                                | 1388 (20.8%)                                | 561 (20.6%)          | 827 (21.0%)        | 951 (27.8%)                              | 282 (23.2%)          | 669 (30.3%)        |
| 76 - 85                                | 1048 (15.7%)                                | 479 (17.6%)          | 569 (14.4%)        | 1151 (33.6%)                             | 414 (34.0%)          | 737 (33.4%)        |
| >85                                    | 443 (6.6%)                                  | 249 (9.1%)           | 194 (4.9%)         | 632 (18.5%)                              | 305 (25.1%)          | 327 (14.8%)        |
| Ethnicity                              | n = 6013                                    | n = 2476             | n = 3937           | n = 3195                                 | n = 1141             | n = 2054           |
| White                                  | 4331 (72.0%)                                | 1841 (74.4%)         | 2490 (70.4%)       | 2702 (84.5%)                             | 961 (84.2%)          | 1741 (84.8%)       |
| Non-White                              | 1682 (28.0%)                                | 635 (25.6%)          | 1 (29.6%)          | 493 (15.4%)                              | 180 (15.8%)          | 313 (15.2%)        |
| Country                                | n = 6472                                    | n = 2629             | n = 3843           | n = 3324                                 | n = 1181             | n = 2143           |
| Belgium                                | 123 (1.9%)                                  | 49 (1.9%)            | 74 (1.9%)          | 110 (3.3%)                               | 39 (3.3%)            | 71 (3.3%)          |
| Egypt                                  | 21 (0.3%)                                   | 11 (0.4%)            | 10 (0.3%)          | 22 (0.7%)                                | 11 (0.9%)            | 11 (0.5%)          |
| Iran                                   | 14 (0.2%)                                   | S                    | S                  | 69 (2.1%)                                | 22 (1.9%)            | 47 (2.2%)          |
| Italy                                  | 20 (0.3%)                                   | S                    | S                  | 84 (2.5%)                                | 29 (2.5%)            | 55 (2.6%)          |
| Netherlands                            | 3036 (46.9%)                                | 1210 (46.0%)         | 1826 (47.5%)       | 1650 (49.6%)                             | 513 (43.4%)          | 1137 (53.1%)       |
| Russian Federation                     | 188 (2.9%)                                  | 89 (3.4%)            | 99 (2.6%)          | 118 (3.5%)                               | 61 (5.2%)            | 57 (2.7%)          |
| Saudi Arabia                           | 333 (5.1%)                                  | 94 (3.6%)            | 239 (6.2%)         | 47 (1.4%)                                | 22 (1.9%)            | 25 (1.2%)          |
| United Kingdom                         | 2640 (40.8%)                                | 1131 (43.0%)         | 1509 (39.3%)       | 1178 (35.4%)                             | 470 (39.8%)          | 708 (33.0%)        |
| Other*                                 | 97 (1.5%)                                   | 33 (1.3%)            | 64 (1.7%)          | 46 (1.4%)                                | 14 (1.2%)            | 32 (1.5%)          |
| <b>Cardiovascular risk factors</b>     |                                             |                      |                    |                                          |                      |                    |
| BMI (kg/m <sup>2</sup> ), mean (SD)    | 28.4 (5.9)                                  | 29.2 (6.9)           | 27.9 (5.2)         | 27.9 (5.6)                               | 28.4 (6.6)           | 27.7 (5.0)         |
| BMI (kg/m <sup>2</sup> ), median (IQR) | 27.7 (24.4-31.4)                            | 28.4 (24.2-32.9)     | 27.2 (24.4-30.6)   | 27.1 (24.2-30.9)                         | 27.5 (23.8-32.0)     | 27.1 (24.4-30.4)   |
| BMI group (kg/m <sup>2</sup> )         | n = 6674                                    | n = 1667             | n = 2511           | n = 2375                                 | n = 786              | n = 1589           |
| <18.5                                  | 83 (2.0%)                                   | 46 (2.8%)            | 37 (1.5%)          | 51 (2.1%)                                | 27 (3.4%)            | 24 (1.5%)          |
| 18.5 - 24.9                            | 1190 (28.5%)                                | 453 (27.2%)          | 737 (29.4%)        | 699 (29.4%)                              | 244 (31.0%)          | 455 (28.6%)        |
| 25.0 - 29.9                            | 1532 (36.7%)                                | 513 (30.8%)          | 1019 (40.6%)       | 913 (38.4%)                              | 232 (29.5%)          | 681 (42.9%)        |

|                                       |              |              |              |               |               |               |
|---------------------------------------|--------------|--------------|--------------|---------------|---------------|---------------|
| 30.0 - 34.9                           | 868 (20.8%)  | 364 (21.8%)  | 504 (20.1%)  | 473 (19.9%)   | 164 (20.9%)   | 309 (19.4%)   |
| >34.9                                 | 505 (12.1%)  | 291 (17.5%)  | 214 (8.5%)   | 239 (10.1%)   | 119 (15.1%)   | 120 (7.5%)    |
| Diabetes                              | n = 6563     | n = 2684     | n = 3879     | n = 3378      | n = 1207      | n = 2171      |
| Yes                                   | 1482 (22.6%) | 627 (23.4%)  | 855 (22.0%)  | 1190 (35.2%)  | 420 (34.8%)   | 770 (35.5%)   |
| Hypertension                          | n = 6507     | n = 2663     | n = 3844     | n = 3324      | n = 1189      | n = 2135      |
| Yes                                   | 2446 (37.6%) | 1079 (40.5%) | 1367 (35.6%) | 2235 (67.2%)  | 826 (69.5%)   | 1409 (66.0%)  |
| Peripheral arterial disease           | n = 4876     | n = 1984     | n = 2892     | n = 2374      | n = 847       | n = 1527      |
| Yes                                   | 106 (2.2%)   | 33 (1.7%)    | 73 (2.5%)    | 233 (9.8%)    | 75 (8.9%)     | 158 (10.3%)   |
| Dyslipidemia                          | n = 6239     | n = 2551     | n = 3688     | n = 3187      | n = 1126      | n = 2061      |
| Yes                                   | 1441 (23.1%) | 580 (22.7%)  | 861 (23.3%)  | 1661 (51.1%)  | 529 (47.0%)   | 1132 (54.9%)  |
| <b>Cardiovascular disease history</b> |              |              |              |               |               |               |
| Any cardiovascular disease            | -            | -            | -            | 3423 (100.0%) | 1217 (100.0%) | 2206 (100.0%) |
| Arrhythmia/conduction disorder        | -            | -            | -            | 1495 (43.8%)  | 531 (43.8%)   | 964 (43.8%)   |
| Supraventricular tachycardia          | -            | -            | -            | 1222 (36.0%)  | 456 (37.9%)   | 766 (34.9%)   |
| Coronary artery disease               | -            | -            | -            | 1416 (41.5%)  | 348 (28.7%)   | 1068 (48.5%)  |
| Myocardial infarction                 | -            | -            | -            | 722 (22.3%)   | 163 (13.9%)   | 559 (27.0%)   |
| Heart failure                         | -            | -            | -            | 732 (21.4%)   | 312 (25.7%)   | 420 (19.1%)   |
| Stage of heart failure                |              |              |              | n = 402       | n = 166       | n = 236       |
| Stage I/II                            | -            | -            | -            | 179 (44.5%)   | 63 (38.0%)    | 116 (49.2%)   |
| Stage III/IV                          | -            | -            | -            | 91 (22.6%)    | 37 (22.3%)    | 54 (22.9%)    |
| Not specified                         | -            | -            | -            | 132 (32.8%)   | 66 (39.8%)    | 66 (28.0%)    |
| Valvular heart disease                | -            | -            | -            | 438 (12.8%)   | 176 (14.5%)   | 262 (11.9%)   |
| Congenital heart disease              | -            | -            | -            | 40 (1.2%)     | 19 (1.6%)     | 21 (1.0%)     |
| Other cardiac disease                 | -            | -            | -            | 491 (14.4%)   | 214 (17.7%)   | 277 (12.6%)   |
| <b>Medication use<sup>‡</sup></b>     | n = 6667     | n = 2724     | n = 3943     | n = 3420      | n = 1215      | n = 2205      |
| Beta-blocker                          | 734 (11.0%)  | 373 (13.7%)  | 361 (9.2%)   | 1853 (54.2%)  | 657 (54.1%)   | 1196 (54.2%)  |
| Anti-arrhythmia agent                 | 95 (1.4%)    | 36 (1.3%)    | 59 (1.5%)    | 274 (8.0%)    | 92 (7.6%)     | 182 (8.3%)    |
| Digoxin                               | 29 (0.4%)    | 15 (0.6%)    | 14 (0.4%)    | 177 (5.2%)    | 82 (6.7%)     | 95 (4.3%)     |
| Diuretic                              | 755 (11.3%)  | 372 (13.7%)  | 383 (9.7%)   | 1214 (35.5%)  | 501 (41.2%)   | 713 (32.3%)   |
| Calcium channel blocker               | 915 (13.7%)  | 387 (14.2%)  | 528 (13.4%)  | 747 (21.8%)   | 270 (22.2%)   | 477 (21.6%)   |
| ACE inhibitor                         | 716 (10.7%)  | 285 (10.5%)  | 431 (10.9%)  | 959 (28.0%)   | 273 (22.5%)   | 686 (31.1%)   |
| Angiotensin receptor blocker          | 534 (8.0%)   | 239 (8.8%)   | 295 (7.5%)   | 550 (16.1%)   | 213 (17.5%)   | 337 (15.3%)   |
| Aldosterone antagonist                | 65 (1.0%)    | 34 (1.2%)    | 31 (0.8%)    | 232 (6.8%)    | 83 (6.8%)     | 149 (6.8%)    |
| Entresto                              | S            | S            | S            | 30 (0.9%)     | S             | 24 (1.1%)     |
| Phosphodiesterase inhibitors          | 15 (0.2%)    | S            | S            | S             | S             | S             |

|                                 |              |             |             |              |             |              |
|---------------------------------|--------------|-------------|-------------|--------------|-------------|--------------|
| Anti-platelet agent             | 657 (9.9%)   | 273 (10.0%) | 384 (9.7%)  | 1210 (35.4%) | 349 (28.7%) | 861 (39.0%)  |
| Coumarin                        | 45 (0.7%)    | 18 (0.7%)   | 27 (0.7%)   | 344 (10.1%)  | 118 (9.7%)  | 226 (10.2%)  |
| Direct oral anticoagulant agent | 241 (3.6%)   | 102 (3.7%)  | 139 (3.5%)  | 803 (23.5%)  | 296 (24.4%) | 507 (23.0%)  |
| Lipid-lowering agent            | 1579 (23.7%) | 643 (23.6%) | 936 (23.7%) | 1857 (54.3%) | 573 (47.2%) | 1284 (58.2%) |
| Insulin                         | 398 (6.0%)   | 170 (6.2%)  | 228 (5.8%)  | 342 (10.0%)  | 126 (10.4%) | 216 (9.8%)   |
| Oral anti-diabetic agent        | 864 (13.0%)  | 362 (13.3%) | 502 (12.7%) | 668 (19.5%)  | 209 (17.2%) | 459 (20.8%)  |
| Other cardiovascular medication | 97 (1.5%)    | 41 (1.5%)   | 56 (1.4%)   | 396 (11.6%)  | 143 (11.8%) | 253 (11.5%)  |
| <b>Procedures</b>               |              |             |             |              |             |              |
| PCI                             | -            | -           | -           | 643 (6.4%)   | 142 (3.6%)  | 501 (8.1%)   |
| CABG                            | -            | -           | -           | 376 (3.7%)   | 57 (1.4%)   | 319 (5.2%)   |
| Intervention performed/planned  |              |             |             | n = 438      | n = 176     | n = 262      |
| No intervention                 | -            | -           | -           | 230 (52.5%)  | 110 (62.5%) | 120 (45.8%)  |
| Intervention                    | -            | -           | -           | 177 (40.4%)  | 50 (28.4%)  | 127 (48.5%)  |
| Not specified                   | -            | -           | -           | 31 (7.1%)    | 16 (9.1%)   | 15 (5.7%)    |

\*Other countries: France, Israel, Portugal, Spain

<sup>†</sup>Supraventricular tachycardia: n total = 3397, n female = 1204, n male = 2193; Myocardial infarction: n total = 3239, n female = 1170, n male = 2069; All other cardiovascular disease (CVD) sub-types: n total = 3413, n female = 1212, n male = 2201.

<sup>‡</sup>Information on baseline medication use was missing for 0.1% of participants without pre-existing CVD and 0.1% of participants with pre-existing CVD. The number of participants in the CVD cohort with missing information on prior procedures was 10 (0.4%) overall, 5 (0.2%) in females and 5 (0.4%) in males.

**Supplementary Table 5** Hospitalisation characteristics and outcomes of the CAPACITY-COVID registry participants, by sex.

| Characteristics                                  | Total<br>(n = 11167) | Female<br>(n = 4438) | Male<br>(n = 6729) |
|--------------------------------------------------|----------------------|----------------------|--------------------|
| <b>Admission</b>                                 |                      |                      |                    |
| Duration of hospitalisation (days), median (IQR) | 8 (4-16)             | 8 (4-15)             | 9 (4-17)           |
| Admission to intensive care unit (ICU)           | 2,531 (22.7%)        | 750 (16.9%)          | 1,781 (26.5%)      |
| Time to ICU admission (days), median (IQR)       | 1 (0-4)*             | 1 (0-4)*             | 1 (0-4)*           |
| Duration of stay in ICU (days), median (IQR)     | 12 (6-22)            | 11 (5-19)            | 12 (6-23)          |
| <b>In-hospital treatment</b>                     | <b>(n = 2531)</b>    | <b>(n = 750)</b>     | <b>(n = 1781)</b>  |
| Vasopressor/inotropic support                    | 1055 (41.7%)         | 271 (36.1%)          | 784 (44.0%)        |
| Invasive ventilation                             | 1977 (78.1%)         | 563 (75.1%)          | 1,414 (79.4%)      |
| Non-invasive ventilation                         | 1316 (52.0%)         | 368 (49.1%)          | 948 (53.2%)        |
| ECMO                                             | 119 (4.7%)           | 26 (3.5%)            | 93 (5.2%)          |

\*n total = 2272, n female = 678, n male = 1594

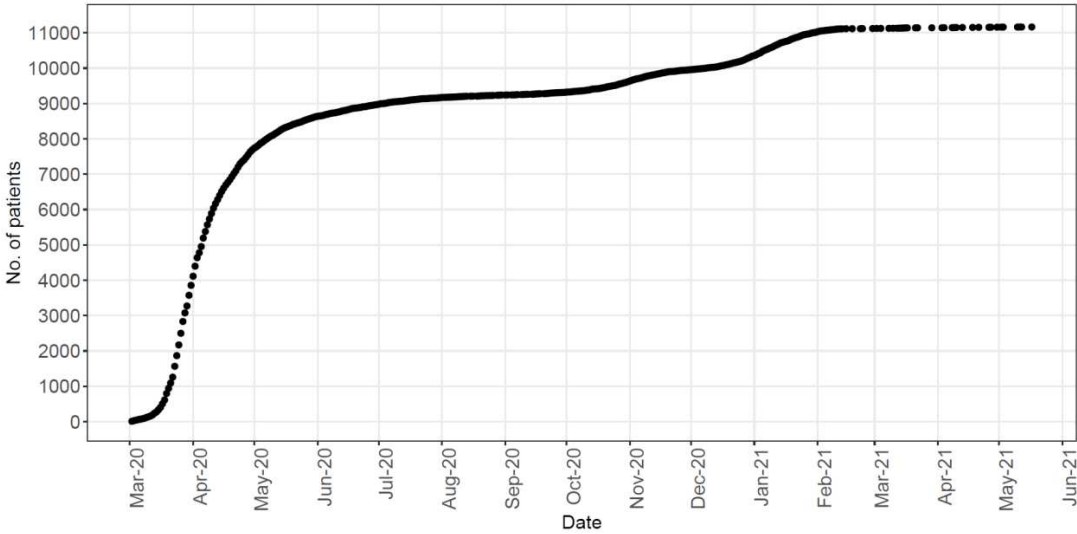

**Supplementary Figure 1** Recruitment to the CAPACITY-COVID registry over time.

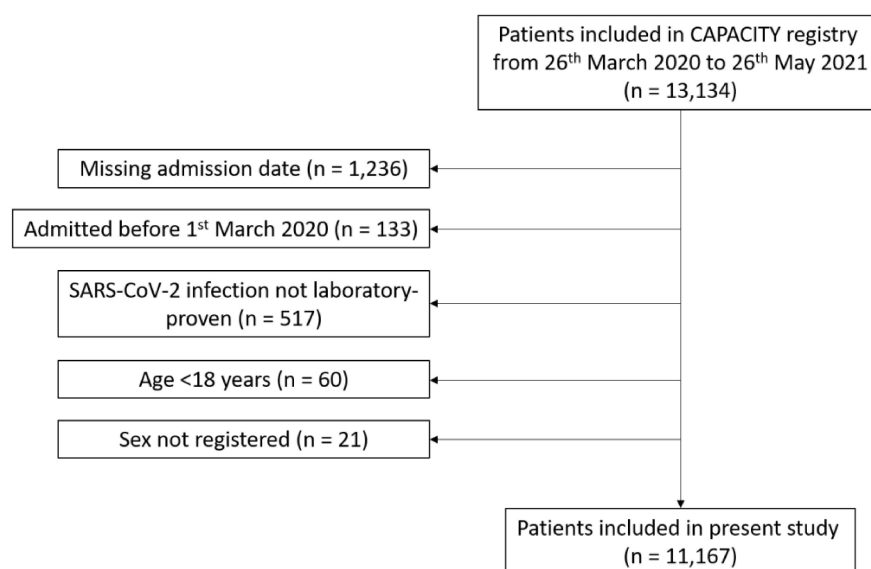

**Supplementary Figure 2** Flow diagram of cohort selection.

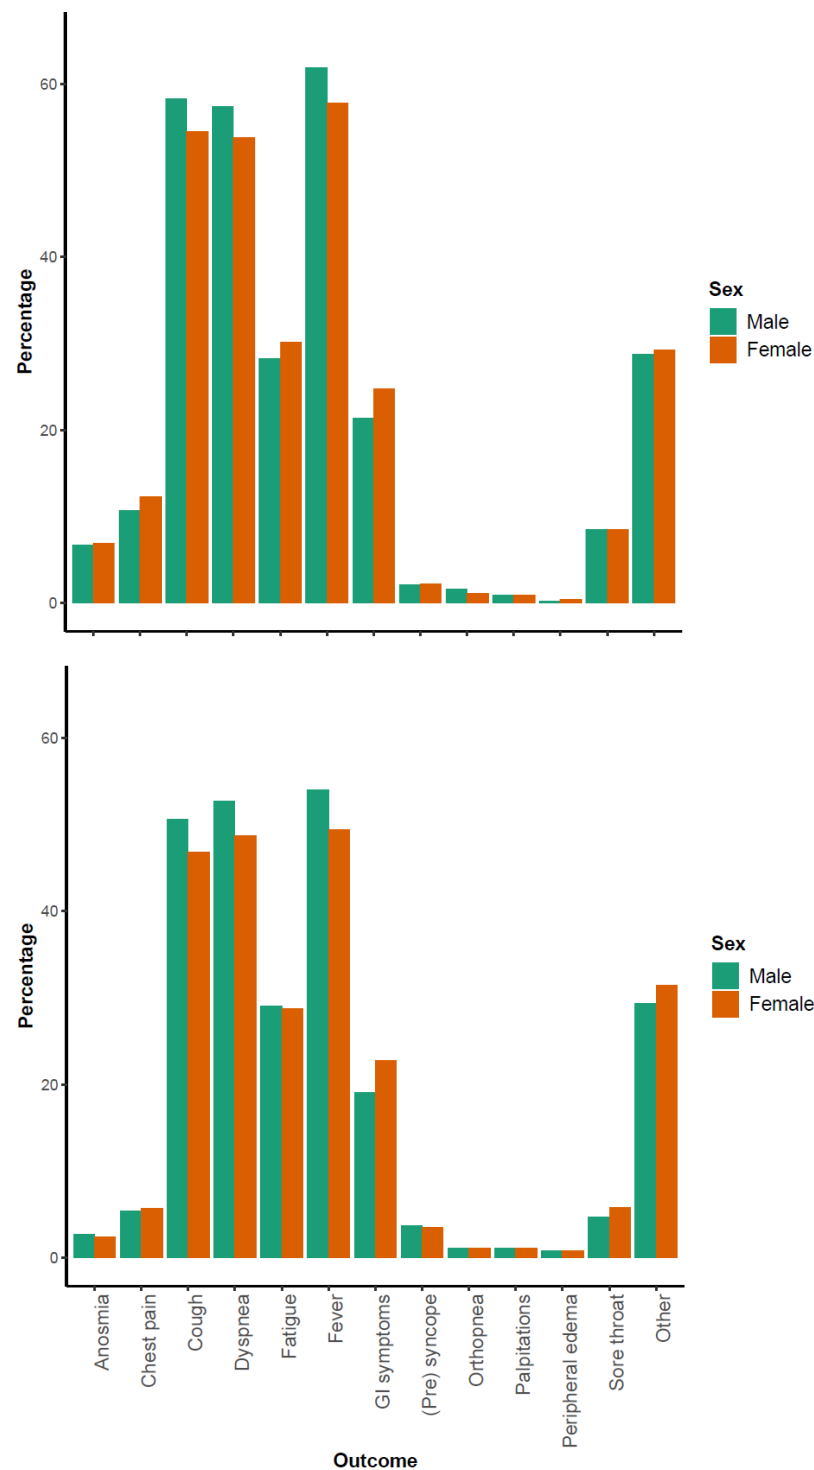

**Supplementary Figure 3** Presenting symptoms in females and males, stratified by age (top panel: ≤65 years; bottom panel: >65 years). Orange = females; Green = males. GI = gastrointestinal.

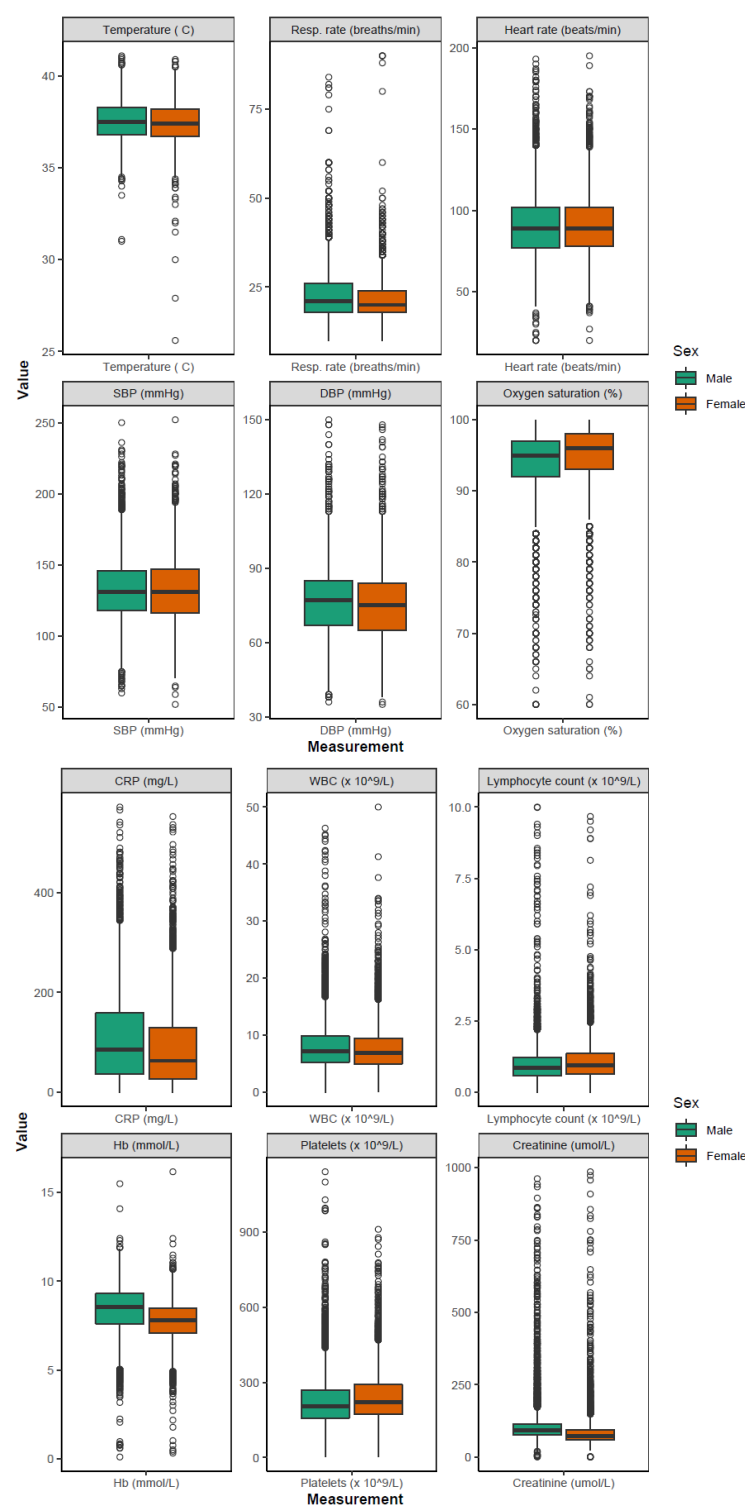

**Supplementary Figure 4** Summary statistics of vital measurements (temperature, respiratory rate, heart rate, blood pressure and oxygen saturation) and laboratory measurements (C-reactive protein, white blood cell count, lymphocyte count, haemoglobin, platelets and creatinine), by sex.

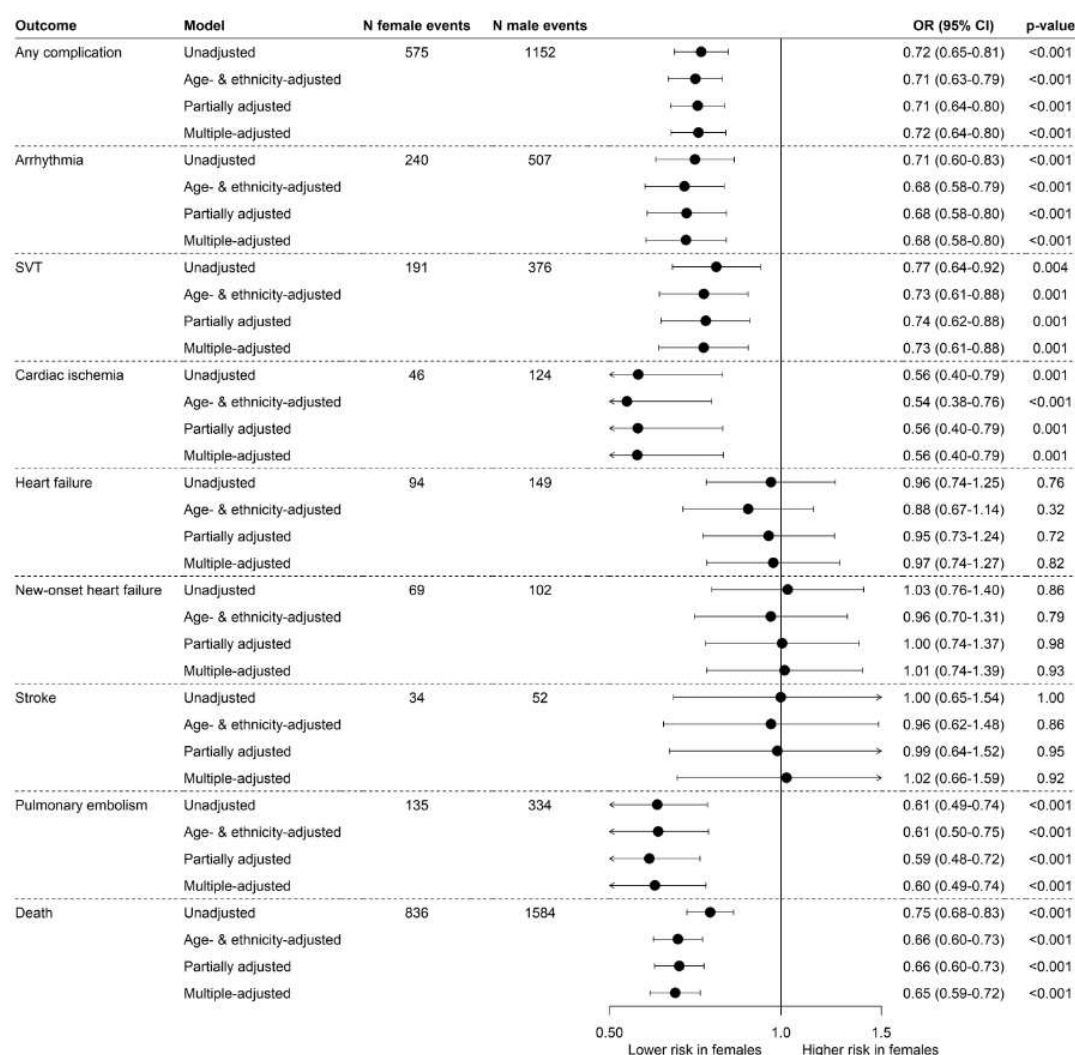

**Supplementary Figure 5** Odds ratios (ORs, with 95% confidence intervals [CIs]) for the association between sex and the outcomes, using four sets of model adjustments: (i) no adjustment, (ii) age and ethnicity, (iii) age, ethnicity, cardiovascular disease (CVD) history and medication use, and (iv) age, ethnicity, CVD history, medication use and CVD risk factors (hypertension, diabetes, dyslipidemia, peripheral arterial disease and body mass index).

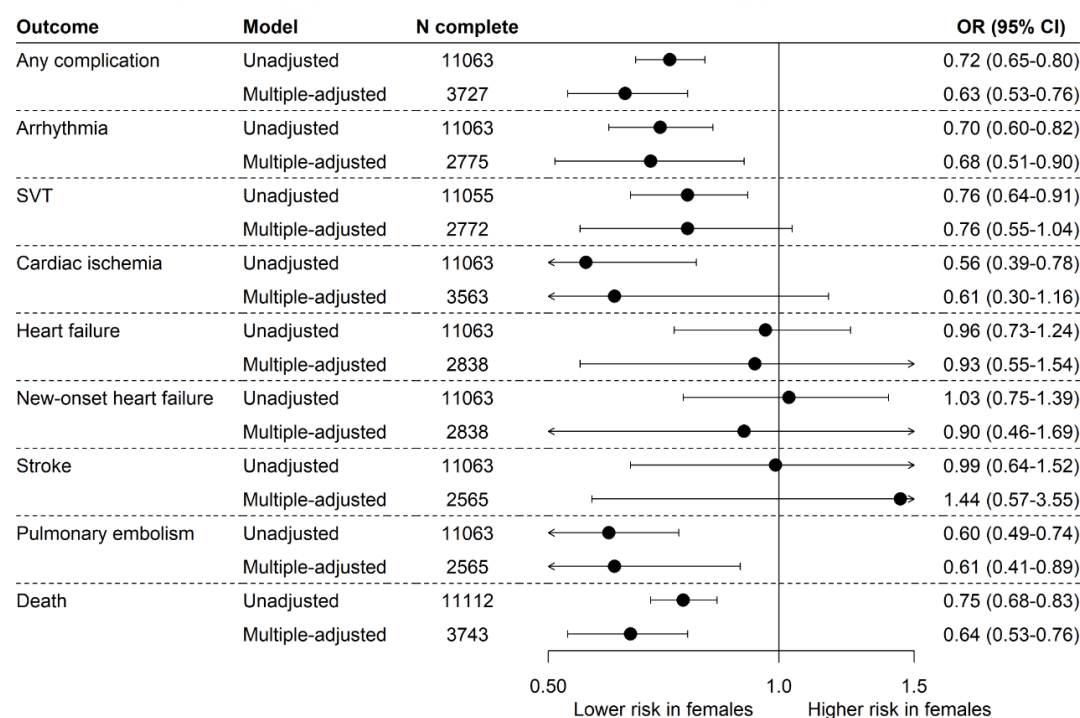

**Supplementary Figure 6** Complete case analyses: Odds ratios (ORs, with 95% confidence intervals [CIs]) for the association between sex and the outcomes of interest. Unadjusted and adjusted estimates are presented. In adjusted analyses, models were adjusted for age, ethnicity, cardiovascular disease (CVD) history, medication use and CVD risk factors (hypertension, diabetes, dyslipidemia, peripheral arterial disease and body mass index).

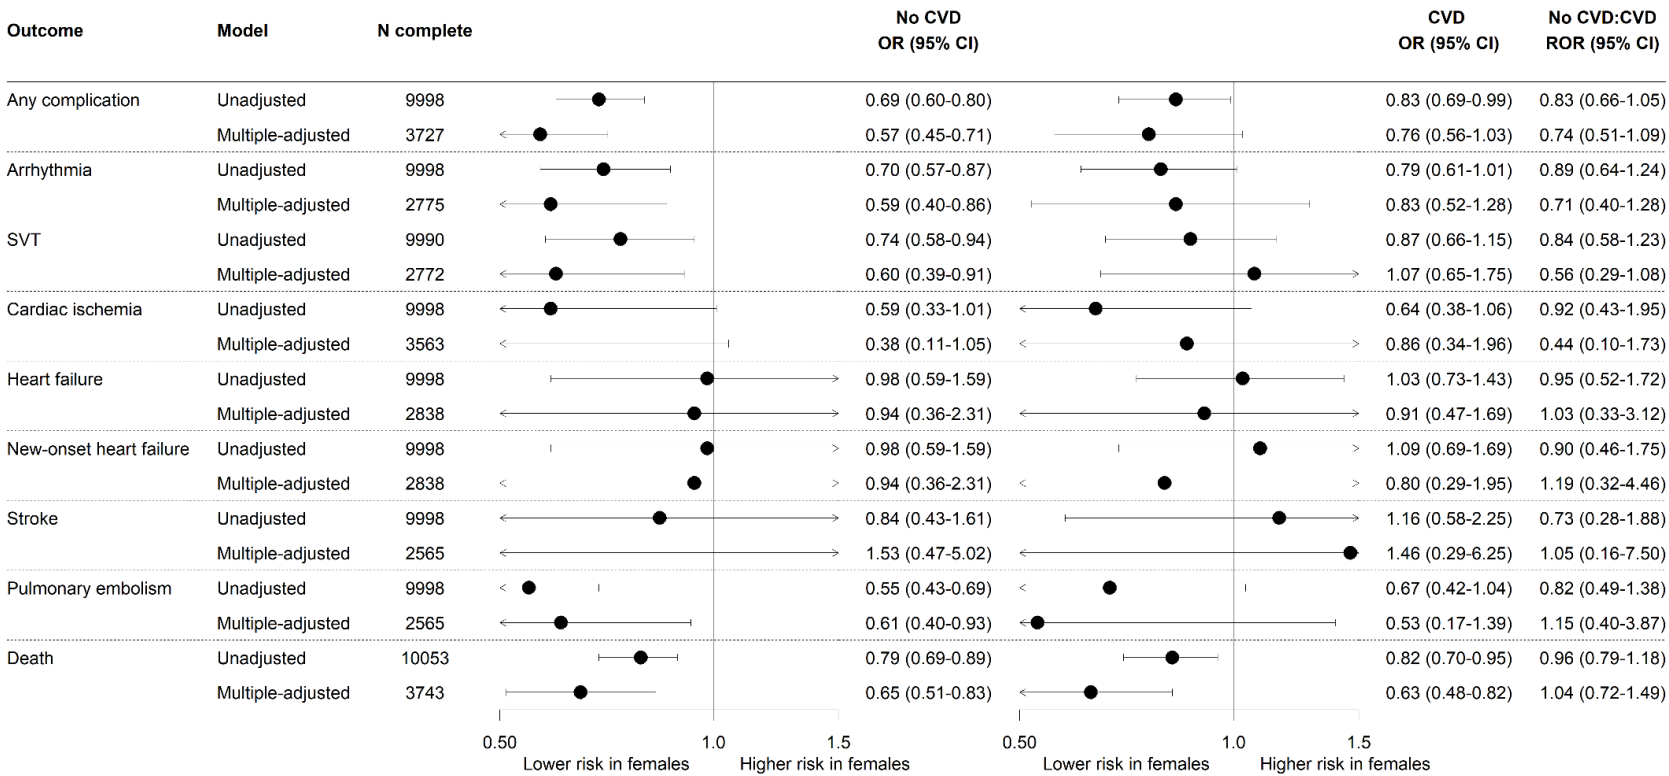

**Supplementary Figure 7** Complete case analyses: Female-to-male odds ratios (ORs, with 95% confidence intervals [CIs]) in the cohorts without and with pre-existing cardiovascular disease (CVD), and the corresponding ratio of OR (with 95% CI). Unadjusted and adjusted estimates are presented. In adjusted analyses, models were adjusted for age, ethnicity, CVD history, medication use and CVD risk factors (hypertension, diabetes, dyslipidemia, peripheral arterial disease and body mass index).

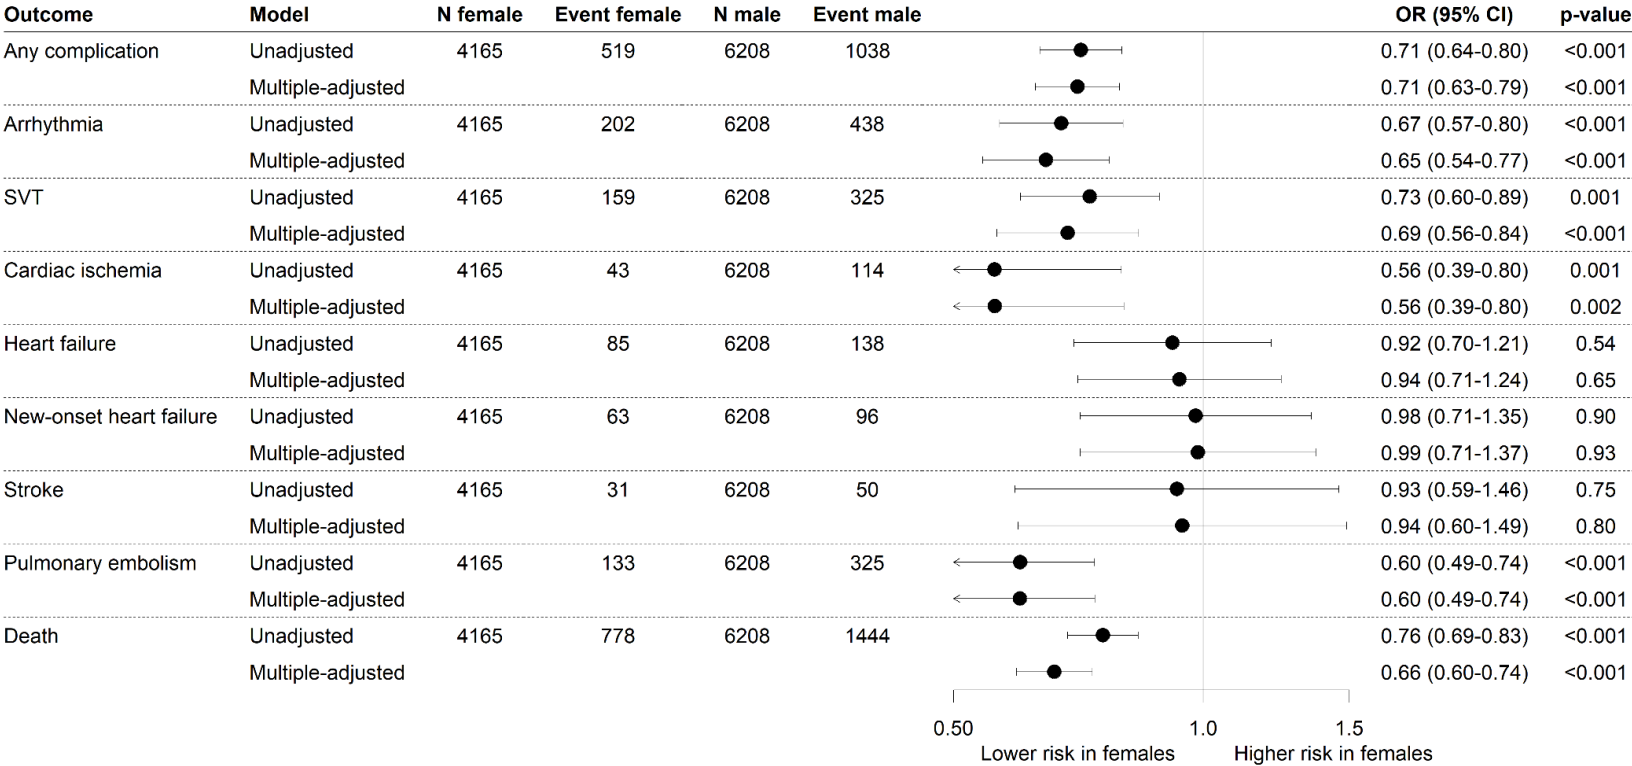

**Supplementary Figure 8** Sensitivity analyses with patients from selective recruitment sites excluded: Odds ratios (ORs, with 95% confidence intervals [CIs]) for the association between sex and the outcomes of interest. Unadjusted and adjusted estimates are presented. In adjusted analyses, models were adjusted for age, ethnicity, cardiovascular disease (CVD) history, medication use and CVD risk factors (hypertension, diabetes, dyslipidemia, peripheral arterial disease and body mass index).

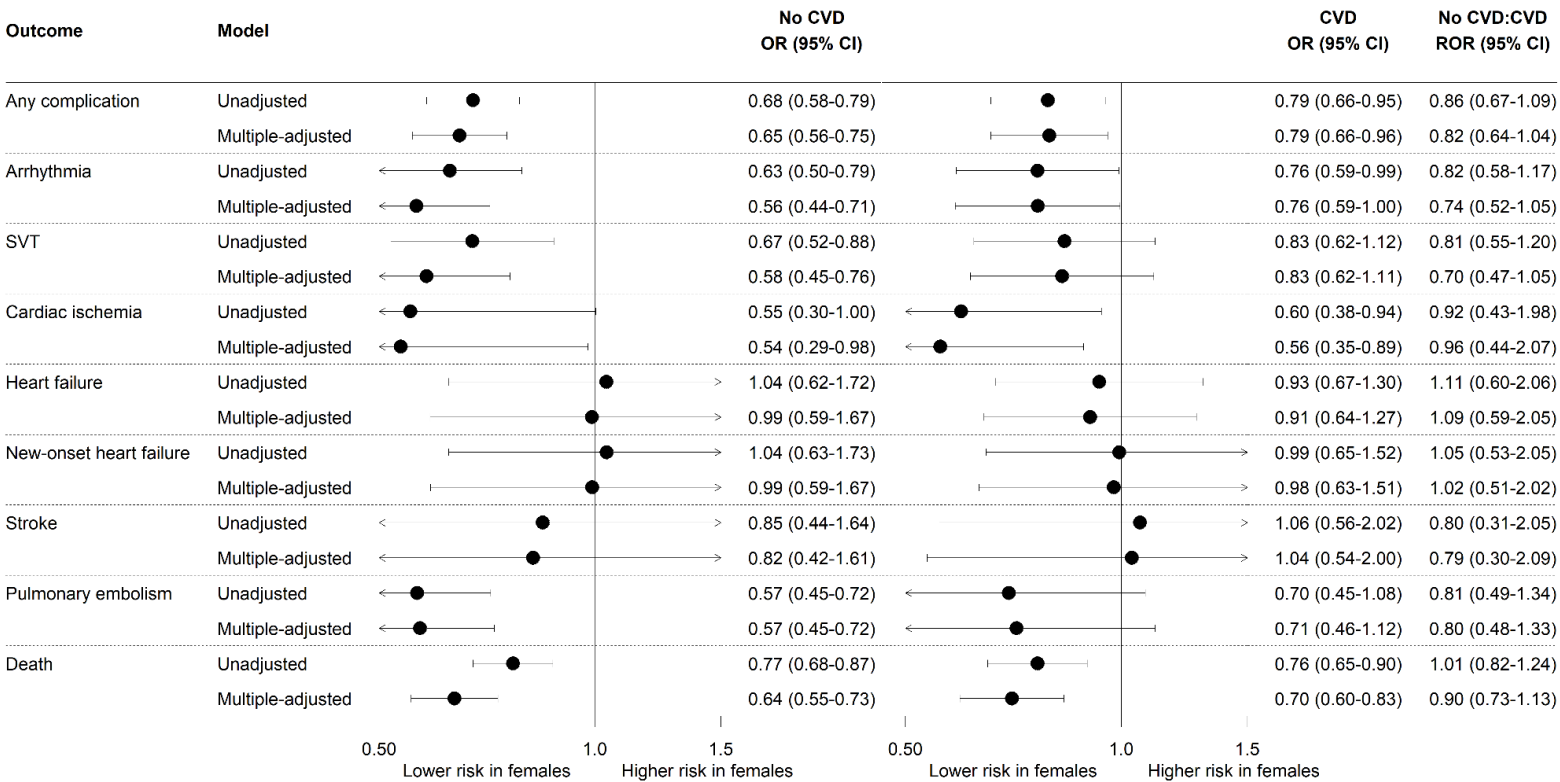

**Supplementary Figure 9** Sensitivity analyses with patients from selective recruitment sites excluded: Female-to-male odds ratios (ORs, with 95% confidence intervals [CIs]) in the cohorts without and with pre-existing cardiovascular disease (CVD), and the corresponding ratio of OR (with 95% CI). Unadjusted and adjusted estimates are presented. In adjusted analyses, models were adjusted for age, ethnicity, CVD history, medication use and CVD risk factors (hypertension, diabetes, dyslipidemia, peripheral arterial disease and body mass index).

## Lay Summary

Compared to men, women with COVID-19 have a lower risk of severe disease, including respiratory failure, hospitalisation and death. It is less clear whether this is also true for cardiovascular complications associated with COVID-19, for example, irregular heartbeat (arrhythmia), decreased blood flow and oxygen to the heart muscle (cardiac ischemia) and lack of blood flow to the brain (stroke). It is also unclear whether differences in COVID-19 severity between women and men is simply explained by the latter having a higher prevalence of pre-existing cardiovascular disease – a known risk factor for severe COVID-19.

In this study, we analysed data from 11,167 patients who were hospitalised with COVID-19 between March 2020 and May 2021. We compared the risk of a range of cardiovascular complications between women and men and also according to whether patients had pre-existing cardiovascular disease or not.

We found that 13 of every 100 women and 17 of every 100 men developed some form of cardiovascular complication during their hospital admission. This corresponds to a 30% lower risk in women compared to men. Arrhythmia was the most common cardiovascular complication, observed in 5 and 8 of every 100 women and men, respectively. Other cardiovascular complication sub-types, such as cardiac ischemia and pulmonary embolism, were less common overall and were similarly found to occur less frequently in women compared to men. There were also some complications, such as heart failure and stroke, for which women and men had a similar risk.

Importantly, we found that differences between the genders were present irrespective of whether they had pre-existing cardiovascular disease. This suggests that the higher risk in men may not only be explained by their higher prevalence of pre-existing cardiovascular disease. Further research is needed to understand why men are at higher risk of severe COVID-19.

## Supplementary References

1. van Buuren S, Groothuis-Oudshoorn K. mice: Multivariate Imputation by Chained Equations in R. *Journal of Statistical Software* 2011;45(3):1 - 67. doi: 10.18637/jss.v045.i03
2. arsenal: An Arsenal of 'R' Functions for Large-Scale Statistical Summaries [program]. 3.6.3 version, 2021.
3. dplyr: A Grammar of Data Manipulation [program]. R package version 1.0.6 version, 2021.
4. forestplot: Advanced Forest Plot Using 'grid' Graphics [program]. R package version 2.0.1 version, 2021.
5. Caforio ALP, Pankuweit S, Arbustini E, et al. Current state of knowledge on aetiology, diagnosis, management, and therapy of myocarditis: a position statement of the European Society of Cardiology Working Group on Myocardial and Pericardial Diseases. *European Heart Journal* 2013;34(33):2636-48. doi: 10.1093/eurheartj/ehv210
6. Adler Y, Charron P, Imazio M, et al. 2015 ESC Guidelines for the diagnosis and management of pericardial diseases: The Task Force for the Diagnosis and Management of Pericardial Diseases of the European Society of Cardiology (ESC) Endorsed by: The European Association for Cardio-Thoracic Surgery (EACTS). *European Heart Journal* 2015;36(42):2921-64. doi: 10.1093/eurheartj/ehv318
7. Habib G, Lancellotti P, Antunes MJ, et al. 2015 ESC Guidelines for the management of infective endocarditis: The Task Force for the Management of Infective Endocarditis of the European Society of Cardiology (ESC) Endorsed by: European Association for Cardio-Thoracic Surgery (EACTS), the European Association of Nuclear Medicine (EANM). *European Heart Journal* 2015;36(44):3075-128. doi: 10.1093/eurheartj/ehv319
8. Roffi M, Patrono C, Collet J-P, et al. 2015 ESC Guidelines for the management of acute coronary syndromes in patients presenting without persistent ST-segment elevation: Task Force for the Management of Acute Coronary Syndromes in Patients Presenting without Persistent ST-Segment Elevation of the European Society of Cardiology (ESC). *European Heart Journal* 2016;37(3):267-315. doi: 10.1093/eurheartj/ehv320
9. Buxton AE, Calkins H, Callans DJ, et al. ACC/AHA/HRS 2006 key data elements and definitions for electrophysiological studies and procedures: a report of the American College of Cardiology/American Heart Association Task Force on Clinical Data Standards (ACC/AHA/HRS Writing Committee to Develop Data Standards on Electrophysiology). *J Am Coll Cardiol* 2006;48(11):2360-96. doi: 10.1016/j.jacc.2006.09.020 [published Online First: 2006/12/13]
